# Supplementary material for: The pyrogeography of eastern boreal Canada from 1901 to 2012 simulated with the LPJ-LMfire model
Source: Copernicus journal article supplement (doi:10.5194/bg-2017-350), 2017-09-20
Supplement: Supplementary file 1 [file bg-2017-350-supplement.pdf]

## Supplementary materials

### Supplement S1

#### Reconstruction of the density of monthly lightning flashes ( $L_m$ ) (n/day/km<sup>2</sup>) between 1901 to 2012

$$[1] \text{coef} = \max(|\max(\int_t \text{CAPEano})|, |\min(\int_t \text{CAPEano})|)$$

$$[2] \text{CAPEano}_N = \text{CAPEano} / \text{coef}$$

$$[3] L_m = \begin{cases} \text{CLDN}_m * (1 + 7.5 * \text{CAPEano}_N), & \text{CAPEano}_N \geq 0 \\ \text{CLDN}_m * (1 + 0.1 * \text{CAPEano}_N), & \text{CAPEano}_N < 0 \end{cases}$$

CAPE anomalies (CAPEano) correspond to monthly differences on a grid cell level at time  $t$  compared to the average of monthly CAPE from 1961 to 1990. For each grid cell, the time-series of CAPEano was normalized to a range between -1 and 1 ( $\text{CAPEano}_N$ ) by dividing CAPEano by the maximum value between the absolute value of the largest positive and negative CAPE anomalies of the time series (eq. 1 and 2). Monthly flash density (/day/km<sup>2</sup>) between 1901 to 2012 was calculated on the base of the monthly flashes climatology between 1999 to 2010 ( $\text{CLDN}_m$ ) but interannual flash variability was applied using  $\text{CAPEano}_N$  and min-to-mean and max-to-mean ratios (eq. 3). We determined min-to-mean and max-to-mean ratios (0.1 and 7.5, respectively; Fig. S1 B) by compiling grid cell values of CLDN database with more than 5 years of observations in July between 1999 and 2010 across Canada and within our study area (Fig. S1 A).

**Fig. S1.** (A) Monthly total number of flashes in Canada and in eastern Canada (our study area) from 1999 to 2010. (B) Box plots of minimum-to-mean and maximum-to-mean ratio for flashes in July from 1999 and 2010 based on 60747 grid cells in Canada with more than 5 years reporting observations.

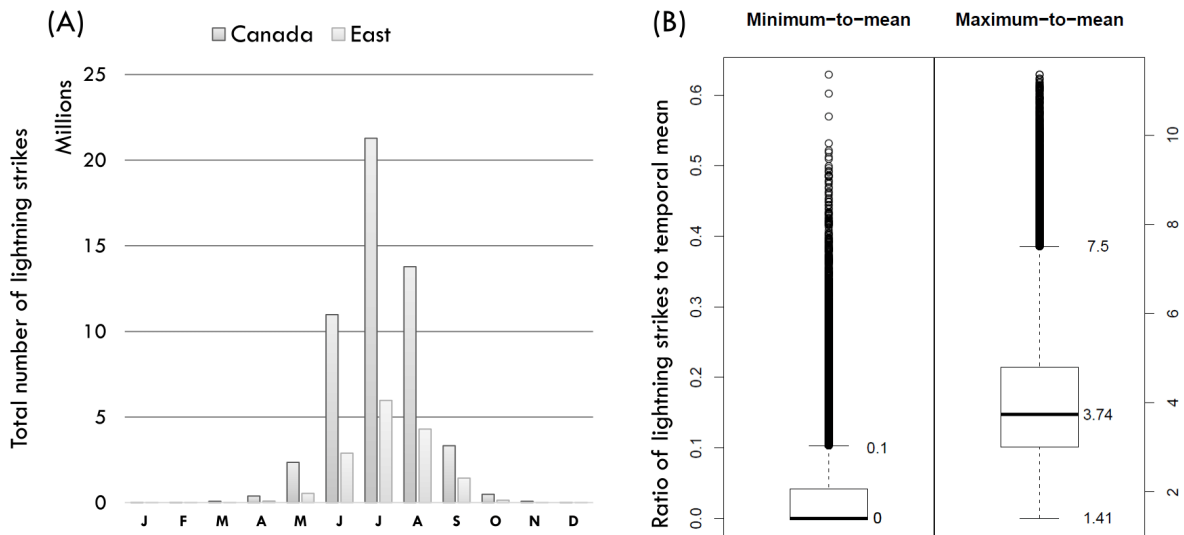

## Supplement S2

**Table S1.** LPJ-LMfire PFT parameter values in this study (boreal needleleaved evergreen tree and summergreen tree parameters values from (Pfeiffer et al., 2013) were assigned for the others parameters not presented in this table).

| Parameters                                                            | Genus-specific PFT     |              |              |                | References                                                     |
|-----------------------------------------------------------------------|------------------------|--------------|--------------|----------------|----------------------------------------------------------------|
|                                                                       | <i>Picea</i>           | <i>Abies</i> | <i>Pinus</i> | <i>Populus</i> |                                                                |
| Fraction of roots in upper soil layer (50cm)                          | 0.9                    | 0.5          | 0.5          | 0.3            | Natural resources Canada 2017 and US forest service            |
| Sapwood turnover period                                               | 20                     | 40           | 20           | 30             |                                                                |
| Leaf to root ratio under non-water stressed conditions                | 0.190                  | 0.165        | 0.165        | 0.14           | Poorter et al. (2012)                                          |
| Summergreen phenology ramp GDD5 requirement to grow full leaf canopy  | 800                    | 1400         | 766          | 180            | Girardin et al. (2011)                                         |
| Sapling (or grass on initialisation) LAI                              | 3.4                    | 9.3          | 4.4          | 3.2            | Calculated from Iio et al. (2014)                              |
| Min./Max. temperature of the coldest month for establishment (°C day) | -31.65/-6.80           | -25.25/-4.85 | -29.25/-9.15 | -29.30/3.70    |                                                                |
| Min GDD5 for establishment (°C day)                                   | 300                    | 400          | 550          | 345            |                                                                |
| Max. temperature of the warmest month to persist (°C day)             | 20.70                  | 20.65        | 20.60        | 24.85          |                                                                |
| Crown length                                                          | 1                      | 1            | 0.4          | 0.5            | Derived from Groot and Schneider (2011) and Hély et al. (2003) |
| Bark thickness                                                        | 0.032                  | 0.031        | 0.040        | 0.027          | Andrews et al. (2005)                                          |
| <b>Fire resistance</b>                                                | Crown damage parameter | 1            | 3            | 2              | <i>personal communications</i>                                 |

## Supplement S3

**Fig. S2.** (A) Local polynomial regression (with 95% confidence interval) between genus-specific cover percentage from Beaudoin et al. (2014) and clay percentage from Hengl et al. (2014) in eastern boreal Canada. Only grid cells with a total cover for 4 species studied greater than 10% have been taken into account in these analyses. (B) Clay percentage distribution in eastern boreal Canada. Each vertical red lines corresponds to the upper limit of the 90% CI of the distribution of clay percentage for each PFTs. (C) Map of clay percentage in eastern boreal Canada with threshold of the upper limit of the 90% CI of the distribution of clay percentage for *Abies* and *Picea* PFTs.

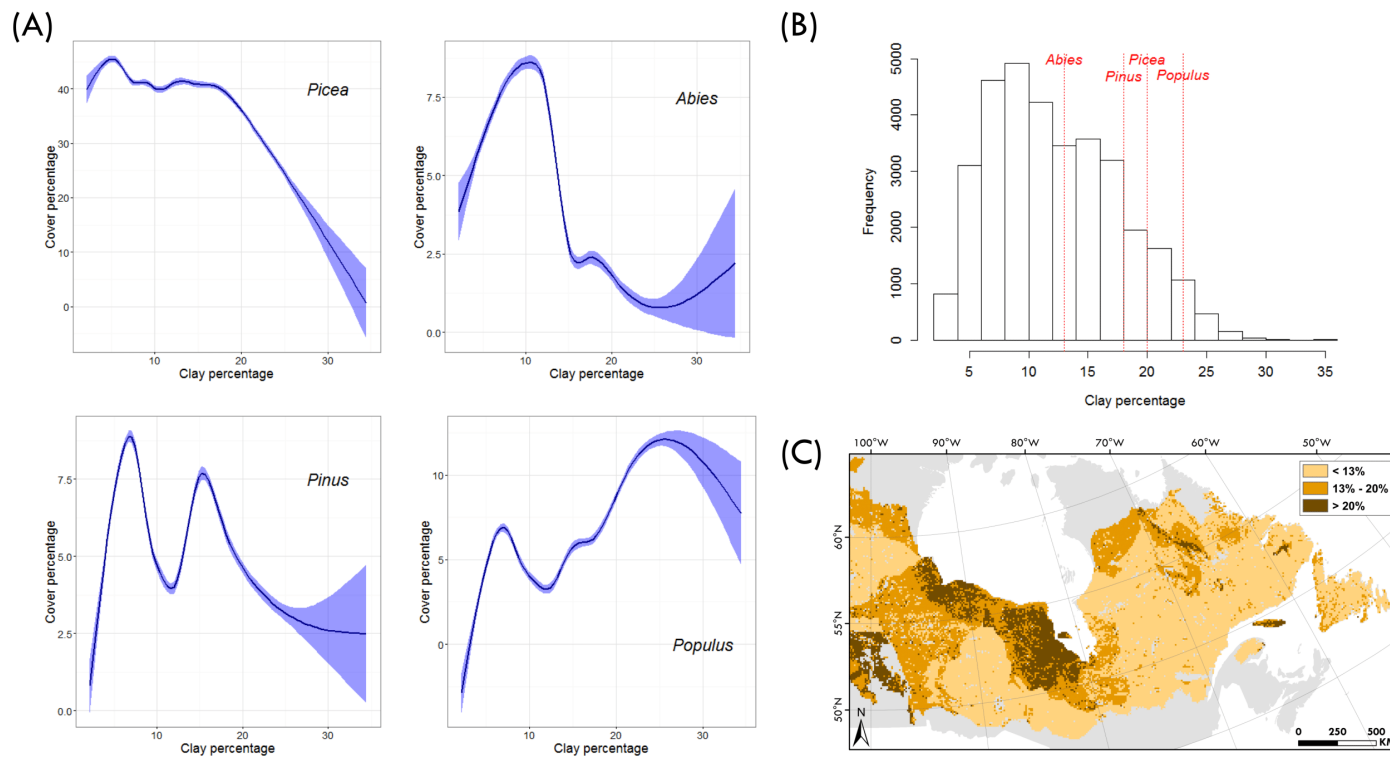

Supplement S4

**Fig. S3.** Location of stand-replacing fire history studies in eastern Canada with correspondence ID number to Table S2.

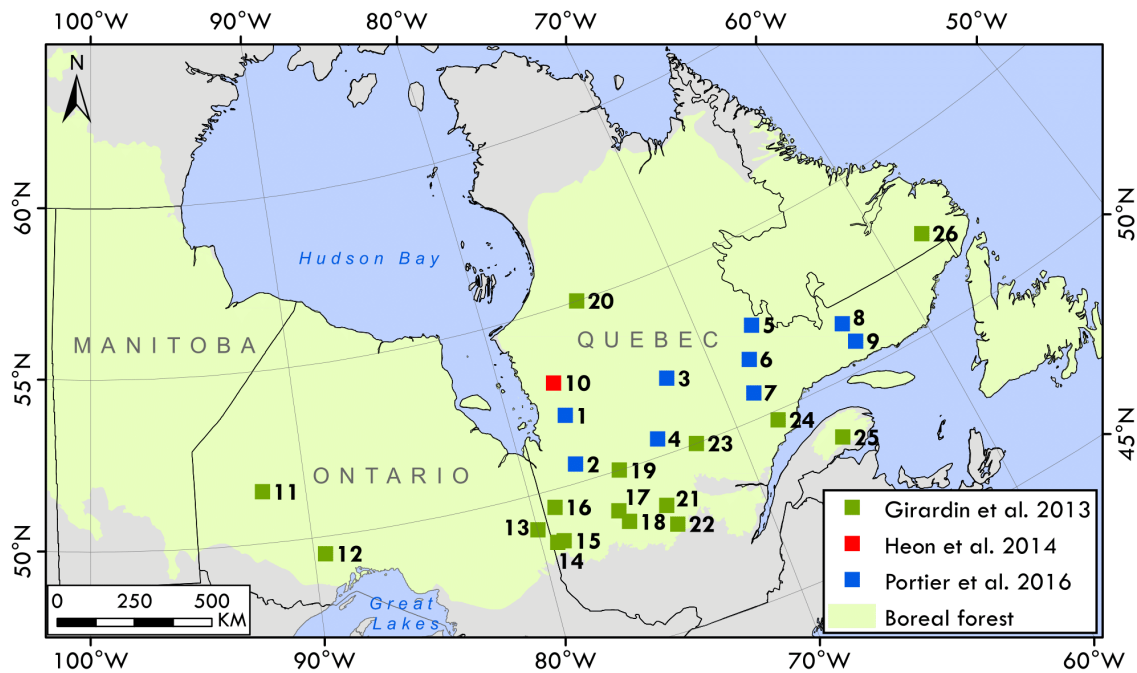

**Table S2.** Observed annual burn rates (with 2.5 and 97.5 percentiles) from stand-replacing fire history studies and from LPJ-LMfire since 1911 to 2012. Significant differences are underlines.

| ID | X             | Localisation          | Observed                      | Simulated                    | References           |
|----|---------------|-----------------------|-------------------------------|------------------------------|----------------------|
| 1  |               | North                 | <u>4.875 (3.119 – 10.642)</u> | <u>0.384 (0.175 – 0.773)</u> |                      |
| 2  |               | South                 | 0.637 (0.410 – 1.030)         | 0.427 (0.211 – 0.768)        |                      |
| 3  |               | North                 | <u>3.190 (1.462 – 11.151)</u> | <u>0.345 (0.069 – 0.752)</u> |                      |
| 4  |               | South                 | 0.477 (0.323 – 0.762)         | 0.484 (0.231 – 0.879)        |                      |
| 5  |               | North                 | <u>2.859 (2.110 – 4.827)</u>  | <u>0.186 (0.043 – 0.373)</u> |                      |
| 6  |               | Center                | 0.354 (0.177 – 0.791)         | 0.199 (0.042 – 0.458)        |                      |
| 7  |               | South                 | 0.146 (0.070 – 0.326)         | 0.262 (0.054 – 0.597)        |                      |
| 8  |               | North                 | <u>1.761 (0.923 – 3.800)</u>  | <u>0.163 (0.026 – 0.373)</u> |                      |
| 9  |               | South                 | 0.129 (0.052 – 0.386)         | 0.151 (0.025 – 0.362)        |                      |
| 10 | 1910-2013     | Baie James            | <u>2.400</u>                  | <u>0.415 (0.164 – 0.835)</u> | (Héon et al. (2014)) |
| 11 | ~1870-1974    | Northern Ontario      | <u>1.920</u>                  | <u>0.648 (0.335 – 1.164)</u> |                      |
| 12 | unknown -2000 | Lake Nipigon          | 0.711                         | 0.689 (0.379 – 1.116)        |                      |
| 13 | 1740-1998     | LAMF                  | 0.580                         | 0.466 (0.000 – 0.855)        |                      |
| 14 | ~1750-1988    | Western Quebec        | 0.720                         | 0.414 (0.000 – 0.726)        |                      |
| 15 | 1580-2000     | Western Abitibi South | 0.334                         | 0.415 (0.000 – 0.753)        |                      |
| 16 | 1530-1996     | Western Abitibi North | 0.604                         | 0.531 (0.297 – 0.892)        |                      |
| 17 | 1770-1995     | Eastern Abitibi       | 0.708                         | 0.435 (0.226 – 0.746)        |                      |
| 18 | 1760-1998     | Abitibi east Quebec   | <u>0.900</u>                  | <u>0.441 (0.241 – 0.747)</u> |                      |
| 19 | 1720-2000     | Waswanipi             | <u>0.812</u>                  | <u>0.439 (0.238 – 0.788)</u> |                      |
| 20 | 1920-1984     | Northern boreal       | <u>1.000</u>                  | <u>0.196 (0.074 – 0.378)</u> |                      |
| 21 | 1720-1998     | Central Quebec 2      | 0.665                         | 0.513 (0.224 – 1.067)        |                      |
| 22 | 1720-1998     | Central Quebec        | 0.790                         | 0.505 (0.192 – 0.930)        |                      |
| 23 | unknown-2000  | Lac Saint Jean        | 0.286                         | 0.411 (0.093 – 0.791)        |                      |
| 24 | 1640-2000     | North Shore           | 0.367                         | 0.272 (0.048 – 0.555)        |                      |
| 25 | 1680-2000     | Gaspésie              | <u>0.643</u>                  | <u>0.150 (0.000 – 0.419)</u> |                      |
| 26 | 1870-1975     | Southeastern Labrador | 0.200                         | 0.124 (0.000 – 0.272)        |                      |

## Supplement S5

**Fig. S4.** Location of fires exceeding 50,000 ha in eastern Canada for three years of extreme fire activity.

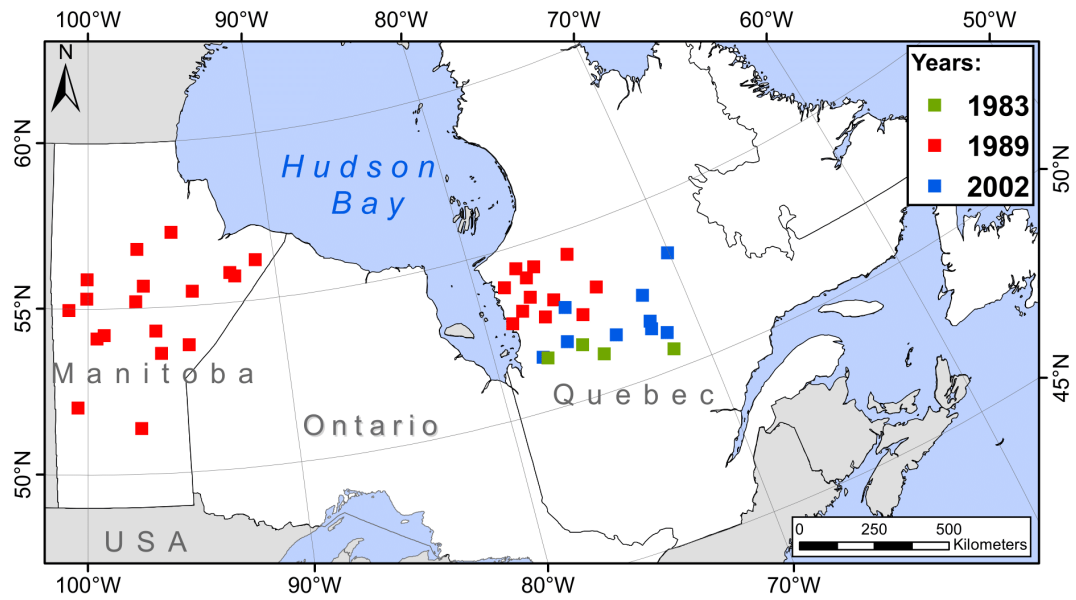

## Supplement S6

**Fig. S5.** (A) Time-series of total annual area burned from 1901 to 2012. Gray blocks correspond to periods with at least three years of annual area burned above the mean annual burn rates for the 1901-2012 period. Orange line correspond to the smooth lines (spar = 0.4) of the temporal series. Black dashed line correspond to the weighed means of the regimes obtain by the sequential application of the Student's t-test (B) The percentage difference between spring and summer total area burned (named the fire seasonality index; FSI) from 1901 to 2012. Black dashed lines is equal to FSI = 50%)

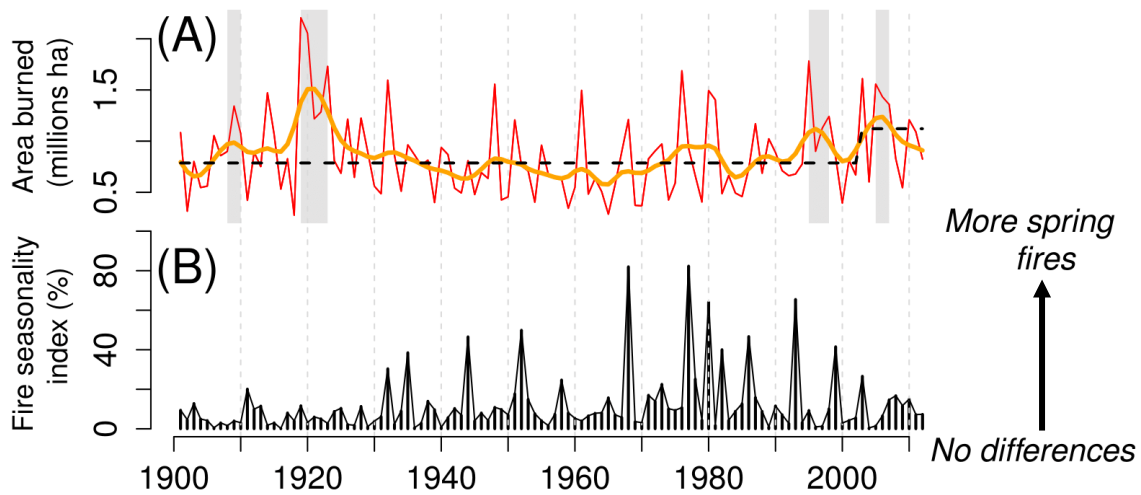

## Supplement S7

**Fig. S6.** LPJ-LMfire net primary productivity (T/ha/yr) simulated across eastern boreal Canada with non-constant (A) and constant (B) atmospheric CO<sub>2</sub> concentration through five periods from 1911 to 2012. (C) Percentage of increase in NPP by [CO<sub>2</sub>] effect.

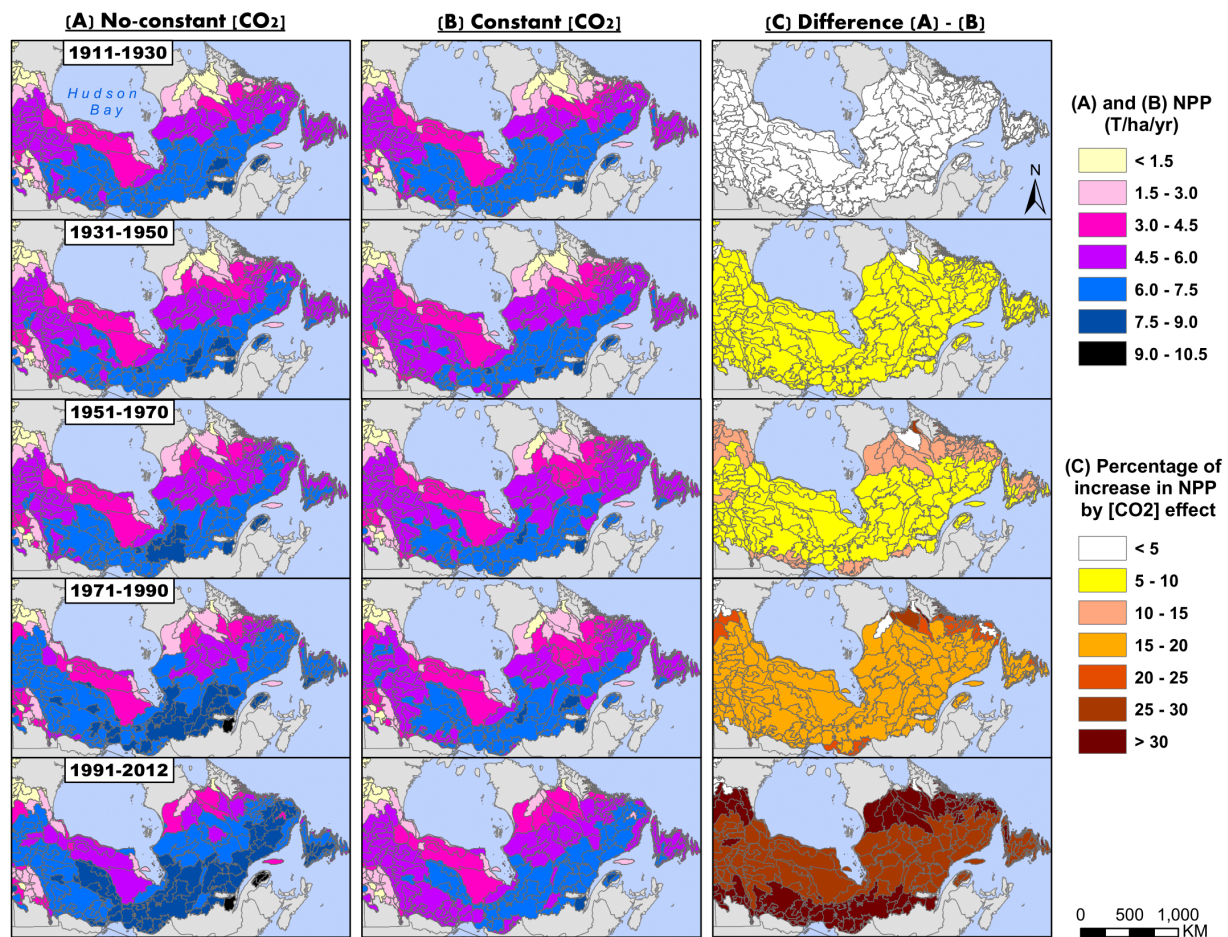

## Supplement S8

**Fig. S7.** (A) Average of cover percentage for each PFT in eastern boreal Canada from 1901 to 2012 (red line are the smooth lines (spar = 0.4)). (B) Ratio of cover percentage between recent period (1911-1930) to past period (1991-2012). Both periods corresponds to grey background on figure A.

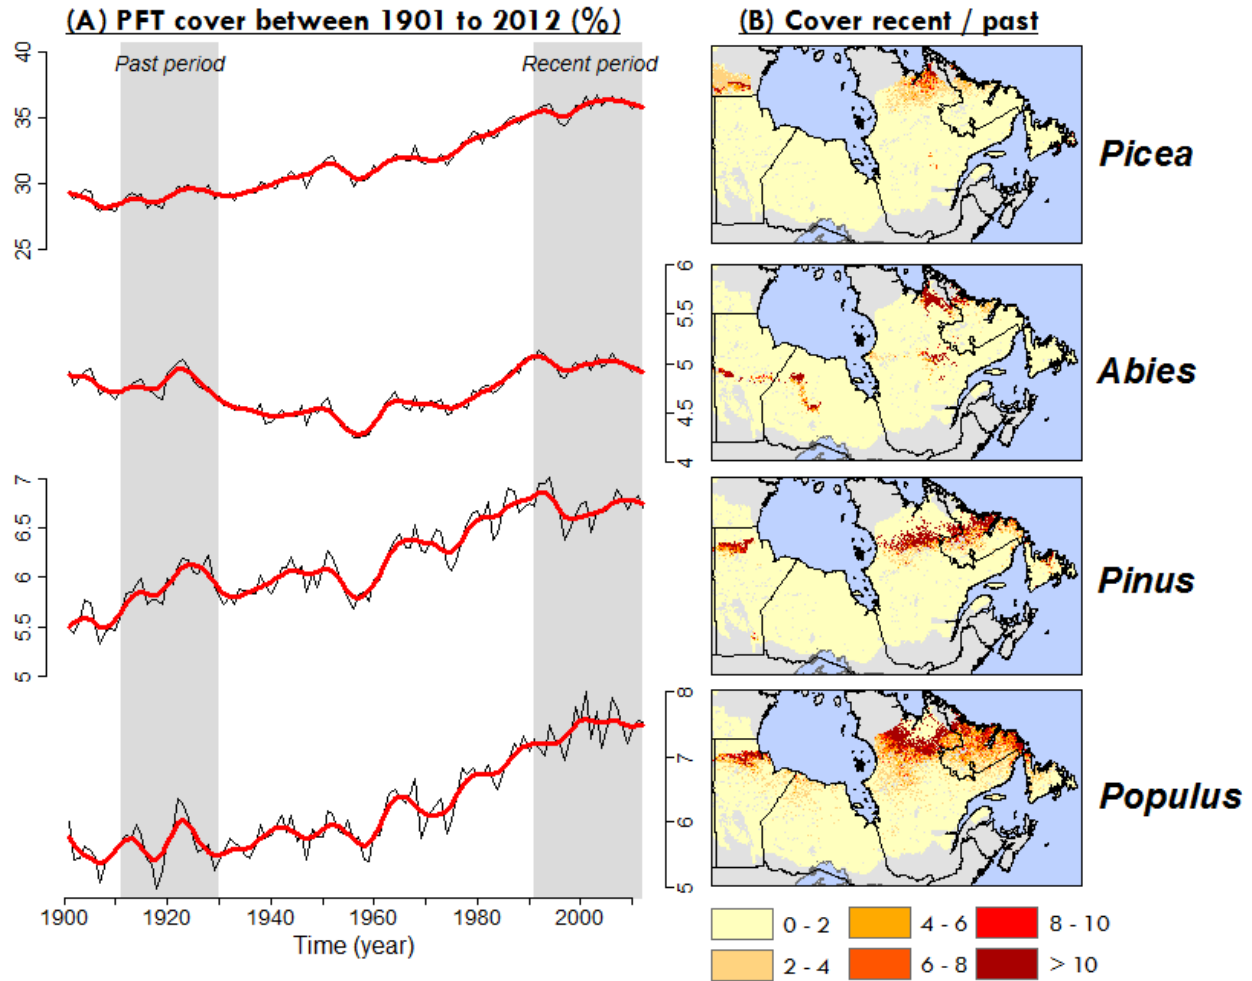

## Supplement S9

**Fig. S8.** Temporal changes in three climate variables: (A) spring and (B) summer mean temperatures, (C) spring and (D) summer mean precipitations, and (E) mean flashes density. Black dashed lines, black full black lines and orange lines correspond respectively to the mean, the regression lines, and the smooth lines (spar = 0.4) for each time-series.

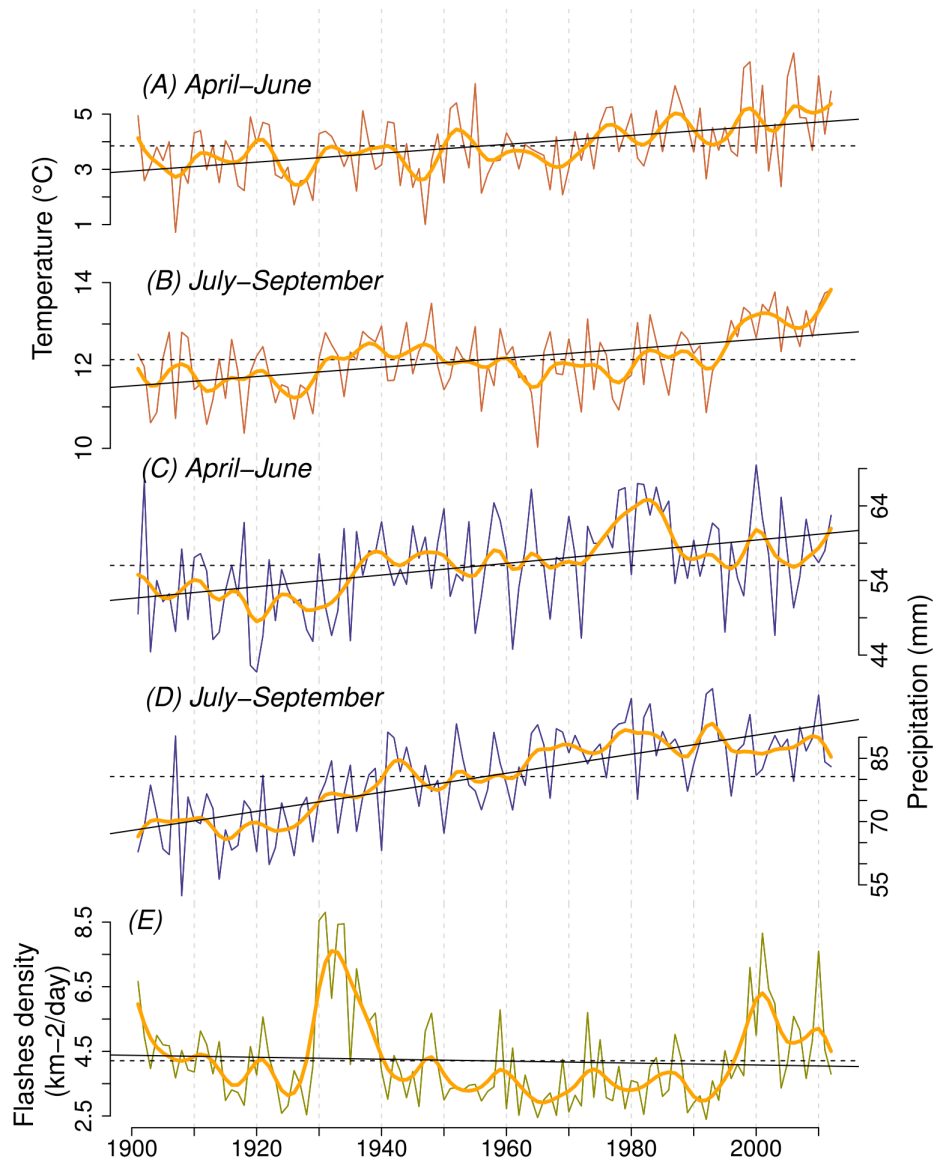

## Supplement S10

**Fig. S9.** Percent of clay and sand in the mineral horizons across eastern boreal Canada at 10km of resolution from (A) Hengl et al. (2014) (0-30cm depth) and (B) Mansuy et al. (2014) (0-15cm depth).

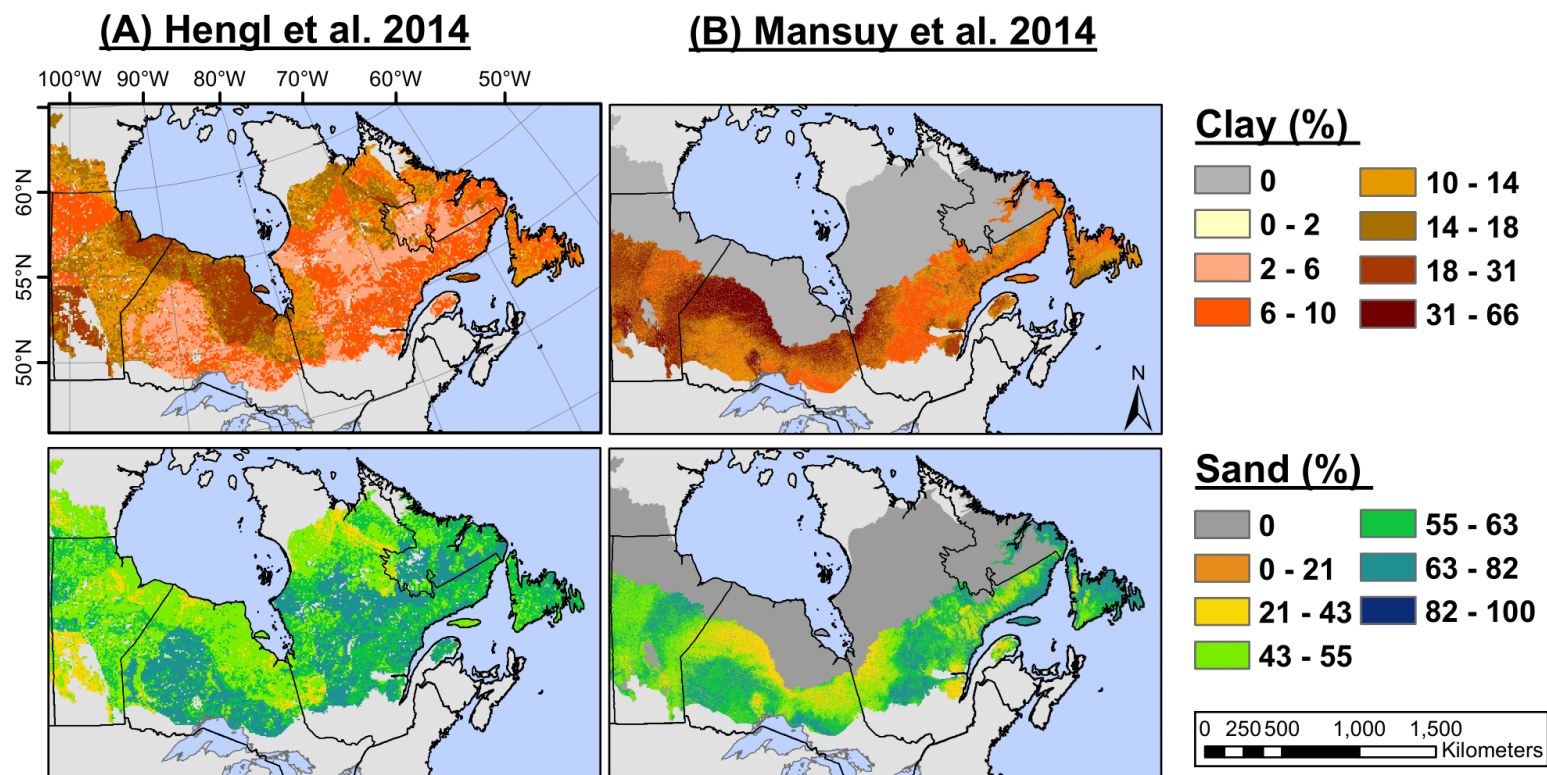

## References

Andrews, P. L., Bevins, C. D. and Seli, R. C. ; BehavePlus fire modeling system, version 4.0: User's Guide. [online] Available from: <https://www.treesearch.fs.fed.us/pubs/5488> (Accessed 22 February 2017), 2005.

Beaudoin, A., Bernier, P. Y., Guindon, L., Villemaire, P., Guo, X. J., Stinson, G., Bergeron, T., Magnussen, S. and Hall, R. J.: Mapping attributes of Canada's forests at moderate resolution through kNN and MODIS imagery, *Can. J. For. Res.*, 44(5), 521–532, doi:10.1139/cjfr-2013-0401, 2014.

Girardin, M. P., Bernier, P. Y., Raulier, F., Tardif, J. C., Conciatori, F. and Guo, X. J.: Testing for a CO<sub>2</sub> fertilization effect on growth of Canadian boreal forests, *J. Geophys. Res. Biogeosciences*, 116, G01012, doi:10.1029/2010JG001287, 2011.

Girardin, M. P., Ali, A. A., Carcaillet, C., Gauthier, S., Hély, C., Le Goff, H., Terrier, A. and Bergeron, Y.: Fire in managed forests of eastern Canada: Risks and options, *For. Ecol. Manag.*, 294, 238–249, doi:10.1016/j.foreco.2012.07.005, 2013.

Groot, A. and Schneider, R.: Predicting maximum branch diameter from crown dimensions, stand characteristics and tree species, *For. Chron.*, 87(4), 542–551, doi:10.5558/tfc2011-053, 2011.

Hély, C., Flannigan, M. and Bergeron, Y.: Modeling tree mortality following wildfire in the southeastern Canadian mixed-wood boreal forest, *For. Sci.*, 49(4), 566–576, 2003.

Hengl, T., de Jesus, J. M., MacMillan, R. A., Batjes, N. H., Heuvelink, G. B. M., Ribeiro, E., Samuel-Rosa, A., Kempen, B., Leenaars, J. G. B., Walsh, M. G. and Gonzalez, M. R.: SoilGrids1km — Global soil information based on automated mapping, *PloS One*, 9(8), e105992, doi:10.1371/journal.pone.0105992, 2014.

Héon, J., Arseneault, D. and Parisien, M.-A.: Resistance of the boreal forest to high burn rates, *Proc. Natl. Acad. Sci.*, 111(38), 13888–13893, doi:10.1073/pnas.1409316111, 2014.

Iio, A., Hikosaka, K., Anten, N. P., Nakagawa, Y. and Ito, A.: Global dependence of field-observed leaf area index in woody species on climate: a systematic review, *Glob. Ecol. Biogeogr.*, 23(3), 274–285, doi:10.1111/geb.12133, 2014.

Mansuy, N., Thiffault, E., Paré, D., Bernier, P., Guindon, L., Villemaire, P., Poirier, V. and Beaudoin, A.: Digital mapping of soil properties in Canadian managed forests at 250 m of resolution using the k-nearest neighbor method, *Geoderma*, 235–236, 59–73, doi:10.1016/j.geoderma.2014.06.032, 2014.

Pfeiffer, M., Spessa, A. and Kaplan, J. O.: A model for global biomass burning in preindustrial time: LPJ-LMfire (v1. 0), *Geosci. Model Dev.*, 6(3), 643–685, doi:10.5194/gmd-6-643-2013, 2013.

Poorter, H., Niklas, K. J., Reich, P. B., Oleksyn, J., Poot, P. and Mommer, L.: Biomass allocation to leaves, stems and roots: meta-analyses of interspecific variation and environmental control, *New Phytol.*, 193(1), 30–50, doi:10.1111/j.1469-8137.2011.03952.x, 2012.

Portier, J., Gauthier, S., Leduc, A., Arseneault, D. and Bergeron, Y.: Fire regime along latitudinal gradients of continuous to discontinuous coniferous boreal forests in eastern Canada, *Forests*, 7(10), 211, doi:10.3390/f7100211, 2016.

Thompson, R. S., Anderson, K. H. and Bartlein, P. J.: Atlas of relations between climatic parameters and distributions of important trees and shrubs in North America, US Department of the Interior, US Geological Survey., 1999.
